# Supplementary material for: IRE1α siRNA relieves endoplasmic reticulum stress-induced apoptosis and alleviates diabetic peripheral neuropathy in vivo and in vitro
Source: PubMed Central journal article supplement (PMC5803253; doi:10.1038/s41598-018-20950-9), 2018-02-07
Supplement: 41598_2018_20950_MOESM1_ESM.pdf [file 41598_2018_20950_MOESM1_ESM.pdf]

IRE1 $\alpha$  siRNA relieves endoplasmic reticulum stress-induced apoptosis and alleviates diabetic peripheral neuropathy *in vivo* and *in vitro*

Weijie Yao<sup>1,\*</sup>, Xinwei Yang<sup>1,\*</sup>, Jiayue Zhu<sup>1</sup>, Biane Gao<sup>1</sup>, Haotian Shi<sup>1</sup>, Liping Xu<sup>1,#</sup>

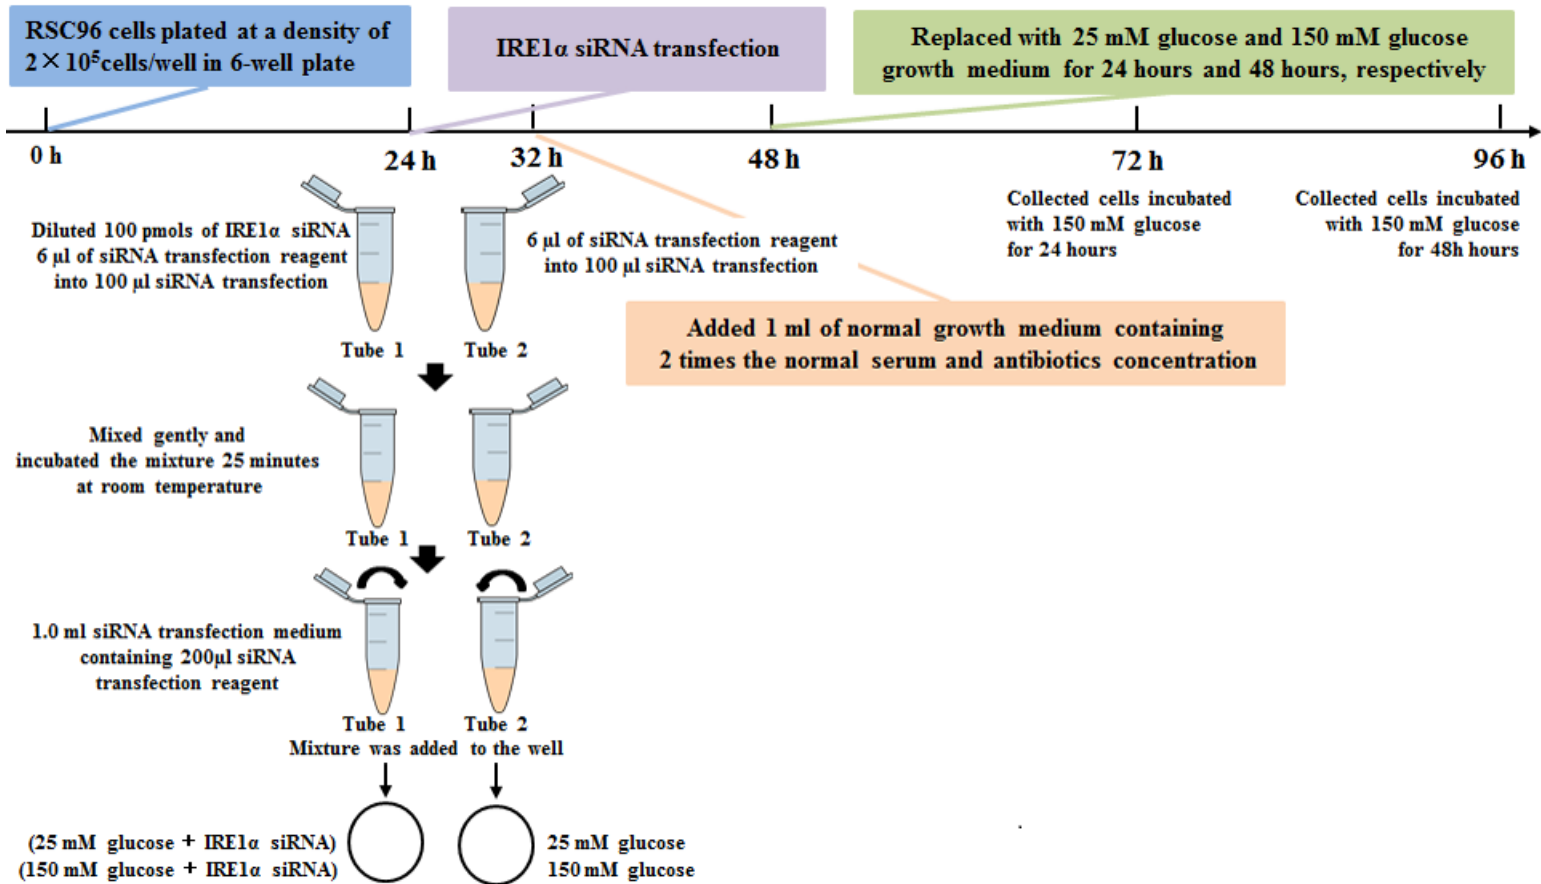

Supplementary Figure. 1 The procedure of RSC96 siRNA transfection
